# Supplementary material for: Multidimensional Apathy in Behavioral Variant Frontotemporal Dementia, Primary Progressive Aphasia, and Alzheimer Disease
Source: PubMed Central journal article supplement — J Geriatr Psychiatry Neurol. 2020 May 15;34(5):349–56. doi: 10.1177/0891988720924716 (PMC8326892; doi:10.1177/0891988720924716), 2020-05-15
Supplement: Supplemetary_Materials.pdf [file Supplemetary_Materials.pdf]

Supplementary Table 1. Correlations in whole dementia group (bvFTD, PPA and AD) of DAS subscales, AES and GDS-15 in dementia group (N=52)

|                | AES   | GDS-15   | DAS Executive | DAS Emotional | DAS Initiation |
|----------------|-------|----------|---------------|---------------|----------------|
| AES            | 1.000 | 0.643*** | 0.830***      | 0.623***      | 0.878***       |
| GDS-15         | -     | 1.000    | 0.618***      | 0.270*        | 0.560***       |
| DAS Executive  | -     | -        | 1.000         | 0.545***      | 0.787***       |
| DAS Emotional  | -     | -        | -             | 1.000         | 0.567***       |
| DAS Initiation | -     | -        | -             | -             | 1.000          |

PPA = Primary Progressive Aphasia; bvFTD = behavioural variant frontotemporal dementia; AD = Alzheimer's disease; AES = Apathy Evaluation Scale; GDS-15 = Geriatric Depression Scale- Short Form; DAS = Dimensional Apathy Scale

$p < 0.05^*$ ;  $p < 0.01^{**}$ ;  $p < 0.001^{***}$
